# Supplementary material
Source: Springer Nature journal article supplement (https://www.springermedizin.de/resource/supplementary/12873_2005_27_MOESM8_ESM.pdf/9431830)
Supplement: MOESM8 [file 9431830]

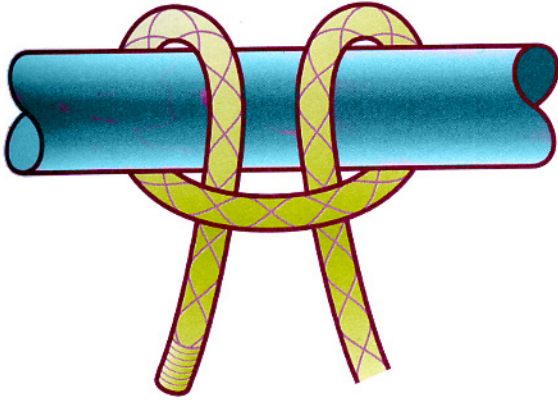

(a) Cow Hitch (Lark's Head)

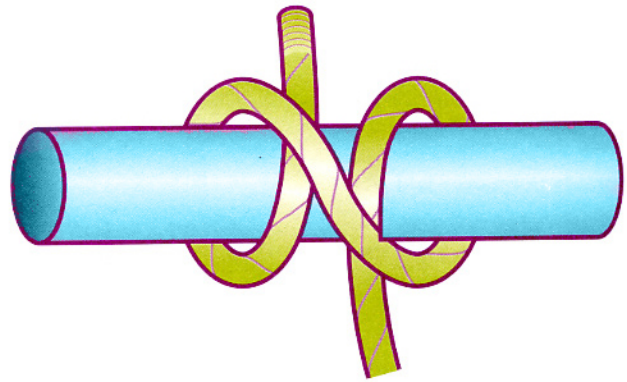

(b) Clove Hitch

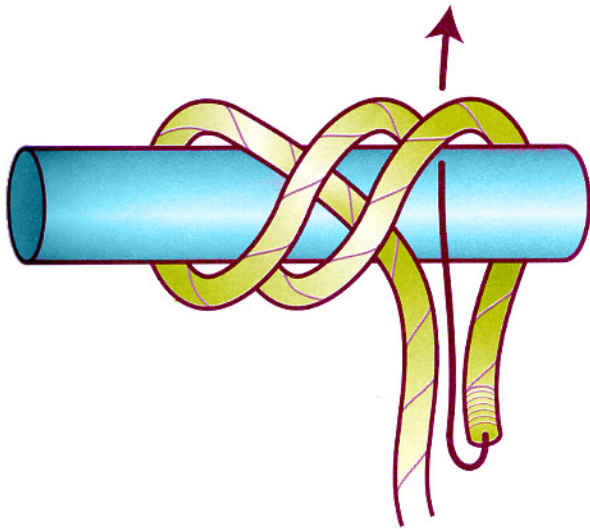

(c) Magnus Hitch being tied

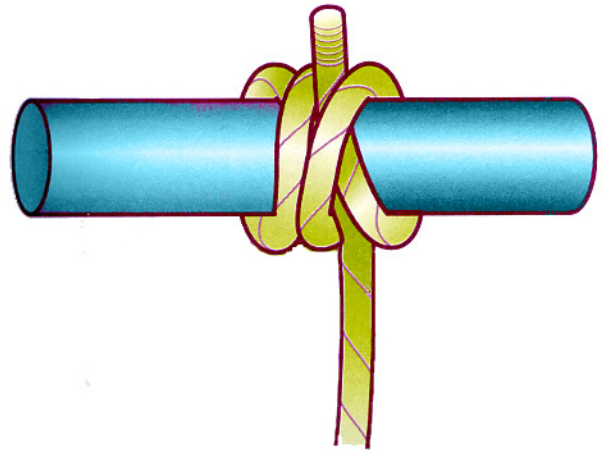

(d) Magnus Hitch

Modified from: Budworth, G. *The Complete Book of Knots*. New York: The Lyons Press, 1997. Permission to reproduce from Octopus Publishing Group Limited and Hamlyn, UK gratefully acknowledged.
